# Supplementary material
Source: MDPI journal article supplement (https://www.mdpi.com/2073-445X/10/9/974)
Supplement: s1 [file s1]

## Supplement Material

Table S1: List of meteorological stations included in the study.

| Station name          | Federal state <sup>1</sup> | Station index | Start of recording | Longitude | Latitude | Elevation in m |
|-----------------------|----------------------------|---------------|--------------------|-----------|----------|----------------|
| Andau                 | BGL                        | 7955          | 1995/07/01         | 17,0333   | 47,7725  | 118            |
| Bruckneudorf          | BGL                        | 6102          | 2007/10/01         | 16,845    | 48,0128  | 166            |
| Eisenstadt-Nordost    | BGL                        | 7704          | 1989/01/01         | 16,5386   | 47,8539  | 184            |
| Neusiedl am See       | BGL                        | 7906          | 2004/08/04         | 16,8417   | 47,9508  | 148            |
| Podersdorf            | BGL                        | 7912          | 2014/07/17         | 16,8344   | 47,8661  | 116            |
| Bad Deutsch-Altenburg | LAT                        | 6111          | 2010/05/11         | 16,9067   | 48,1364  | 169            |
| Brunn am Gebirge      | LAT                        | 5820          | 2008/09/25         | 16,27     | 48,1070  | 291            |
| Gänserndorf-Stadt     | LAT                        | 4224          | 2004/01/01         | 16,7136   | 48,3378  | 163            |
| Gross-Enzersdorf      | LAT                        | 5972          | 1983/07/01         | 16,5592   | 48,1997  | 154            |
| Gumpoldskirchen       | LAT                        | 5881          | 1990/11/01         | 16,2822   | 48,0403  | 219            |
| Hohenau               | LAT                        | 2601          | 2007/07/01         | 16,9044   | 48,6164  | 154            |
| Laa/Th. Kläranlage    | LAT                        | 2401          | 2006/12/18         | 16,3897   | 48,7314  | 184            |
| Langenlebern          | LAT                        | 4081          | 1992/08/01         | 16,1181   | 48,3239  | 175            |
| Leiser Berge          | LAT                        | 2415          | 1998/04/01         | 16,3717   | 48,5589  | 457            |
| Mistelbach            | LAT                        | 2430          | 2004/07/01         | 16,61     | 48,5708  | 191            |
| Poysdorf-Ost          | LAT                        | 2503          | 1991/12/01         | 16,6375   | 48,669   | 198            |
| Retz/Windmühle        | LAT                        | 905           | 1993/12/01         | 15,9417   | 48,7611  | 320            |
| Schöngraben           | LAT                        | 2207          | 2007/04/01         | 16,0617   | 48,6033  | 253            |
| Schwechat             | LAT                        | 5990          | 1940/08/01         | 16,5697   | 48,1103  | 183            |
| Stockerau             | LAT                        | 4030          | 1997/06/01         | 16,1925   | 48,3969  | 203            |
| Wolkersdorf           | LAT                        | 4125          | 2008/07/23         | 16,5075   | 48,3803  | 185            |
| Zwerndorf             | LAT                        | 4305          | 1996/12/17         | 16,8314   | 48,3381  | 144            |

<sup>1</sup>BGL = Burgenland; LAT = Lower Austria

Table S2: Soil erodibility classes (0-5; in boldface) of DIN 19706 subject to soil texture and organic content of dry soil according to DIN German Institute for Standardisation [29]

| German textural classes | Soil texture      |                                 | Organic content of dry soil |          |            |
|-------------------------|-------------------|---------------------------------|-----------------------------|----------|------------|
|                         | Description       | Composition                     | <1%                         | 1 to 15% | >15 to 30% |
| Tt                      | Clay              | 65-100% Cl, 0-35% Si, 0-35% Sa  |                             |          |            |
| Tu4                     | Very silty clay   | 25-45% Cl, 65-75% Si, 0-10% Sa  |                             |          |            |
| Tu3                     | Medium silty clay | 30-45% Cl, 50-65% Si, 0-20% Sa  |                             |          |            |
| Tu2                     | Low silty clay    | 45-65% Cl, 30-55% Si, 0-25% Sa  |                             |          |            |
| Tl                      | Loamy clay        | 45-65% Cl, 15-30% Si, 5-40% Sa  | <b>1</b>                    | <b>0</b> | <b>1</b>   |
| Ts2                     | Low sandy clay    | 45-65% Cl, 0-15% Si, 20-55% Sa  |                             |          |            |
| Ts3                     | Medium sandy clay | 35-45% Cl, 0-15% Si, 40-65% Sa  |                             |          |            |
| Ts4                     | Very sandy clay   | 25-35% Cl, 0-15% Si, 50-75% Sa  |                             |          |            |
| Lts                     | Sandy-clay loam   | 25-45% Cl, 15-30% Si, 25-60% Sa |                             |          |            |
| Ls4                     | Very sandy loam   | 17-25% Cl, 15-30% Si, 45-68% Sa |                             |          |            |
| Ls3                     | Medium sandy loam | 17-25% Cl, 30-40% Si, 35-53% Sa |                             |          |            |
| Ls2                     | Low sandy loam    | 17-25% Cl, 40-50% Si, 25-43% Sa |                             |          |            |
| Lt2                     | Low clay loam     | 25-35% Cl, 30-50% Si, 15-45% Sa |                             |          |            |
| Lt3                     | Medium clay loam  | 35-45% Cl, 30-50% Si, 5-35% Sa  |                             |          |            |
| Lu                      | Silty loam        | 17-30% Cl, 50-65% Si, 5-33% Sa  |                             |          |            |
| Uu                      | Silt              | 0-8% Cl, 80-100% Si, 0-20% Sa   | <b>2</b>                    | <b>1</b> | <b>2</b>   |
| Ut2                     | Low clay silt     | 8-12% Cl, 65-92% Si, 0-27% Sa   |                             |          |            |
| Ut3                     | Medium clay silt  | 12-17% Cl, 65-88% Si, 0-23% Sa  |                             |          |            |
| Ut4                     | Very clay silt    | 17-25% Cl, 65-83% Si, 0-18% Sa  |                             |          |            |
| Uls                     | Sandy-loamy silt  | 8-17% Cl, 50-65% Si, 18-42% Sa  |                             |          |            |
| Sl4                     | Very loamy sand   | 12-17% Cl, 10-40% Si, 43-78% Sa |                             |          |            |
| St3                     | Medium clay sand  | 17-25% Cl, 0-15% Si, 60-83% Sa  |                             |          |            |

|      |                          |                                                 |   |   |   |
|------|--------------------------|-------------------------------------------------|---|---|---|
| Us   | Sandy silt               | 0-8% Cl, 50-80% Si, 12-50% Sa                   |   |   |   |
| Slu  | Silty-loamy sand         | 8-17% Cl, 40-50% Si, 33-52% Sa                  | 3 | 2 | 3 |
| Sl3  | Medium loamy sand        | 8-12% Cl, 10-40% Si, 48-82% Sa                  |   |   |   |
| St2  | Low clay sand            | 5-17% Cl, 0-10% Si, 73-95% Sa                   |   |   |   |
| Sl2  | Low loamy sand           | 5-8% Cl, 10-25% Si, 67-85% Sa                   |   |   |   |
| Su2  | Low silty sand           | 0-5% Cl, 10-25% Si, 70-90% Sa                   | 4 | 3 | 4 |
| Su3  | Medium silty sand        | 0-8% Cl, 25-40% Si, 52-75% Sa                   |   |   |   |
| Su4  | Very silty sand          | 0-8% Cl, 40-50% Si, 42-60% Sa                   |   |   |   |
| mS   | Medium sand              | <5% Cl, <10% Si, <20% FS, >70% MS, <15% CS      |   |   |   |
| gS   | Coarse sand              | <5% Cl, <10% Si, <20% FS, <30% MS, >40% CS      |   |   |   |
| mSgs | Coarse sandy medium sand | <5% Cl, <10% Si, 0-40% FS, 25-70% MS, 20-50% CS | 5 | 4 | 5 |
| gS   | Coarse sand              | <5% Cl, <10% Si, 0-50% FS, 0-50% MS, 50-100% CS |   |   |   |
| fSms | Medium sandy fine sand   | <5% Cl, <10% Si, 20-50% FS, 40-70% MS, <10% CS  |   |   |   |
| fS   | Fine sand                | <5% Cl, 10% Si, >75% FS, <15% MS, few grains CS | 5 | 5 | 5 |
| mSfs | Fine sandy medium sand   | <5% Cl, <10% Si, 50-75% FS, 15-50% MS, <5% CS   |   |   |   |
| fSgs | Coarse sandy fine sand   | <5% Cl, <10% Si, 25-70% FS, 0-40% MS, 20-50% CS |   |   |   |

Cl = Clay, Si = Silt, Sa = Sand, FS = fine Sand, MS = Medium sand, CS = Coarse Sand

0 = no soil erodibility, 1 = very low soil erodibility, 2 = low soil erodibility, 3 = medium soil erodibility, 4 = high soil erodibility, 5 = very high soil erodibility

Note 1: Composition is based on the German textural class breaks: Cl < 2.0 µm, Si 2.0-63 µm, Sa 63-2000 µm, FS 63-200 µm, MS 200-630 µm, CS 630-2000 µm

Note 2: Upper boarders of composition are always meant to be “less than”. We avoid to use < due to better readability.

Table S3: Assignment of protection classes to different types of fruits. Protection classes: 1 (very low), 2 (low), 3 (moderate), 4 (high), 5 (very high), n.c. (not considered)

| Type of fruit                           | Class | Type of fruit                                                           | Class |
|-----------------------------------------|-------|-------------------------------------------------------------------------|-------|
| amaranth                                | 1     | wheatgrass                                                              | 2     |
| berries                                 | 1     | winter caraway (carum carvi)                                            | 2     |
| buckwheat (fagopyrum)                   | 1     | winter triticale                                                        | 2     |
| chickpea                                | 1     | oil flax                                                                | 3     |
| corncob                                 | 1     | green rye                                                               | 3     |
| field bean (vicia faba)                 | 1     | winter wheat (genus triticum)                                           | 3     |
| field bean (vicia faba), cereal mixture | 1     | clover                                                                  | 3     |
| field bean (vicia faba), pea mixture    | 1     | emmer wheat (Triticum dicoccum), einkorn<br>wheat (Triticum monococcum) | 3     |
| field vegetable                         | 1     | winter canola (brassica rapa subsp. Sylvestris)                         | 3     |
| field vegetables                        | 1     | winter corn mixture                                                     | 3     |
| field vegetables, cucumber              | 1     | winter durum (triticum durum)                                           | 3     |
| flower and ornamental plant             | 1     | winter poppy                                                            | 3     |
| forage beet                             | 1     | winter spelt (triticum spelta)                                          | 3     |
| forage potatoes                         | 1     | giant miscanthus (Miscanthus × giganteus)                               | 4     |
| fruits, hop                             | 1     | green fallow                                                            | 4     |
| grain maize                             | 1     | mustard                                                                 | 4     |
| grain pea                               | 1     | sudan grass (sorghum × drummondi, sorghum<br>sudanense)                 | 4     |
| green maize                             | 1     | winter barley (hordeum vulgare)                                         | 4     |
| hemp                                    | 1     | winter oat (avena sativa)                                               | 4     |
| holy thistle (silybum marianum)         | 1     | winter rape (brassica napus)                                            | 4     |
| lentil                                  | 1     | winter rye (secale cereale)                                             | 4     |
| lupin (genus Lupinus)                   | 1     | winter vetch (genus vicia)                                              | 4     |
| maize                                   | 1     | abandoned land (20 years)                                               | 5     |
| millet                                  | 1     | annually meadow                                                         | 5     |
| nectar source fallow                    | 1     | annually tree nursery                                                   | 5     |
| new potatoes                            | 1     | apricot                                                                 | 5     |
| new potatoes, buckwheat                 | 1     | arbotetum (multiannual)                                                 | 5     |
| new potatoes, field vegetable           | 1     | bedding meadow                                                          | 5     |
| new potatoes, maize                     | 1     | cherry                                                                  | 5     |
| peas, mixed cereals                     | 1     | chestnut (castanea sativa)                                              | 5     |
| peas, mixed cereals, buckwheat          | 1     | clover, field vegetable                                                 | 5     |
| peas, mixed cereals, field vegetables   | 1     | conservation area                                                       | 5     |
| potatoes                                | 1     | copses                                                                  | 5     |
| quinoa (chenopodium quinoa)             | 1     | dessert apple                                                           | 5     |

|                                                       |   |                                             |      |
|-------------------------------------------------------|---|---------------------------------------------|------|
| rolled sod                                            | 1 | dessert pear                                | 5    |
| sainfoin                                              | 1 | dry stone wall                              | 5    |
| seed corn mixture                                     | 1 | edible nut                                  | 5    |
| seed potatoes                                         | 1 | elder                                       | 5    |
| silage maize                                          | 1 | forage grass                                | 5    |
| sorghum                                               | 1 | forest conservation                         | 5    |
| sorghum (genus sorghum)                               | 1 | fruit                                       | 5    |
| soybean in separate rows                              | 1 | grassland natural monument                  | 5    |
| squash (curcubita maxima)                             | 1 | grassland pile of stones                    | 5    |
| strawberries                                          | 1 | grassland pond                              | 5    |
| strawberries, field vegetables                        | 1 | grassland riparian margin                   | 5    |
| sugar beet                                            | 1 | hedges                                      | 5    |
| summer caraway (carum carvi)                          | 1 | lucerne                                     | 5    |
| summer poppy                                          | 1 | mature reforestation                        | 5    |
| summer vetch (genus vicia)                            | 1 | nectarine                                   | 5    |
| sunchoke (helianthus tuberosus)                       | 1 | other field forage                          | 5    |
| sweet lupins (Lupinus alba)                           | 1 | other grasslands                            | 5    |
| sweetcorn                                             | 1 | other pasture lands                         | 5    |
| table potatoes                                        | 1 | other vineyards                             | 5    |
| turnip mixture                                        | 1 | pasture land                                | 5    |
| vetch (genus Vicia)                                   | 1 | peach                                       | 5    |
| vetchlings (genus Lathyrus)                           | 1 | permanent crop                              | 5    |
| emmer wheat (Triticum dicoccum), einkorn              | 2 | permanent pasture                           | 5    |
| wheat (Triticum monococcum), summer                   |   | plum                                        | 5    |
| gold of pleasure                                      | 2 | primal reforestation                        | 5    |
| medical plant                                         | 2 | quince                                      | 5    |
| oil radish (raphanus sativus var. oleiformis)         | 2 | sour cherry (prunus ceasus)                 | 5    |
| oil squash                                            | 2 | vine                                        | 5    |
| other oil seeds                                       | 2 | vine nursery                                | 5    |
| peluskins (pisum sativum subsp. sativum var. arvense) | 2 | vineyard                                    | 5    |
| phacelia (genus Phacelia)                             | 2 | wood fuel robinia                           | 5    |
| roman fennel                                          | 2 | wood fuel without robinia                   | 5    |
| soybean                                               | 2 | flower and ornamental plant covered by foil | n.c. |
| spice plant                                           | 2 | flower and ornamental plant in greenhouse   | n.c. |
| St. John's wort                                       | 2 | fruits in polytunnel                        | n.c. |
| summer barley (hordeum vulgare)                       | 2 | fruits in greenhouse                        | n.c. |
| summer bread wheat (triticum aestivum)                | 2 | other arable fruits                         | n.c. |
| summer corn mixture                                   | 2 | other arable lands                          | n.c. |
| summer durum (triticum durum)                         | 2 |                                             |      |

|                                         |   |                            |      |
|-----------------------------------------|---|----------------------------|------|
| summer oat ( <i>avena sativa</i> )      | 2 | other conservation areas   | n.c. |
| summer rape ( <i>brassica napus</i> )   | 2 | other fruits in polytunnel | n.c. |
| summer rye ( <i>secale cereale</i> )    | 2 | other special frutis       | n.c. |
| summer spelt ( <i>triticum spelta</i> ) | 2 | spice plant in greenhouse  | n.c. |
| summer triticale                        | 2 | spice plant in polytunnel  | n.c. |
| summer wheat ( <i>genus triticum</i> )  | 2 | vegetable in greenhouse    | n.c. |
| sunflower ( <i>helianthus annuus</i> )  | 2 | vegetable in polytunnel    | n.c. |

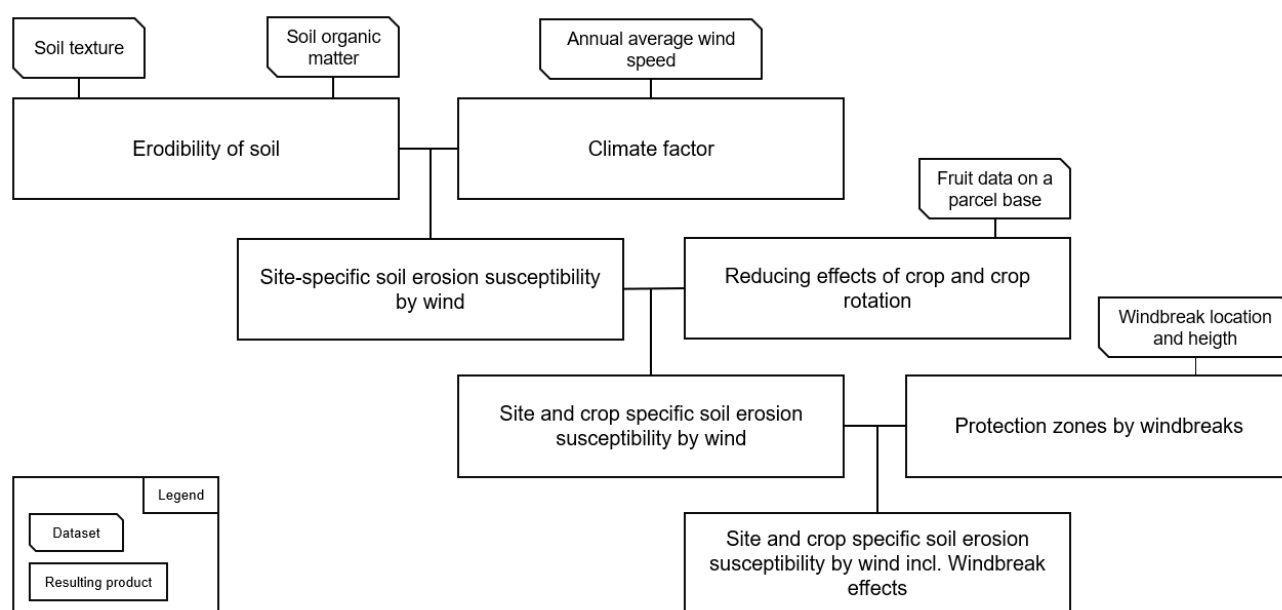

Figure S1: Flow chart of the qualitative wind erosion evaluation scheme DIN 19706 [29]

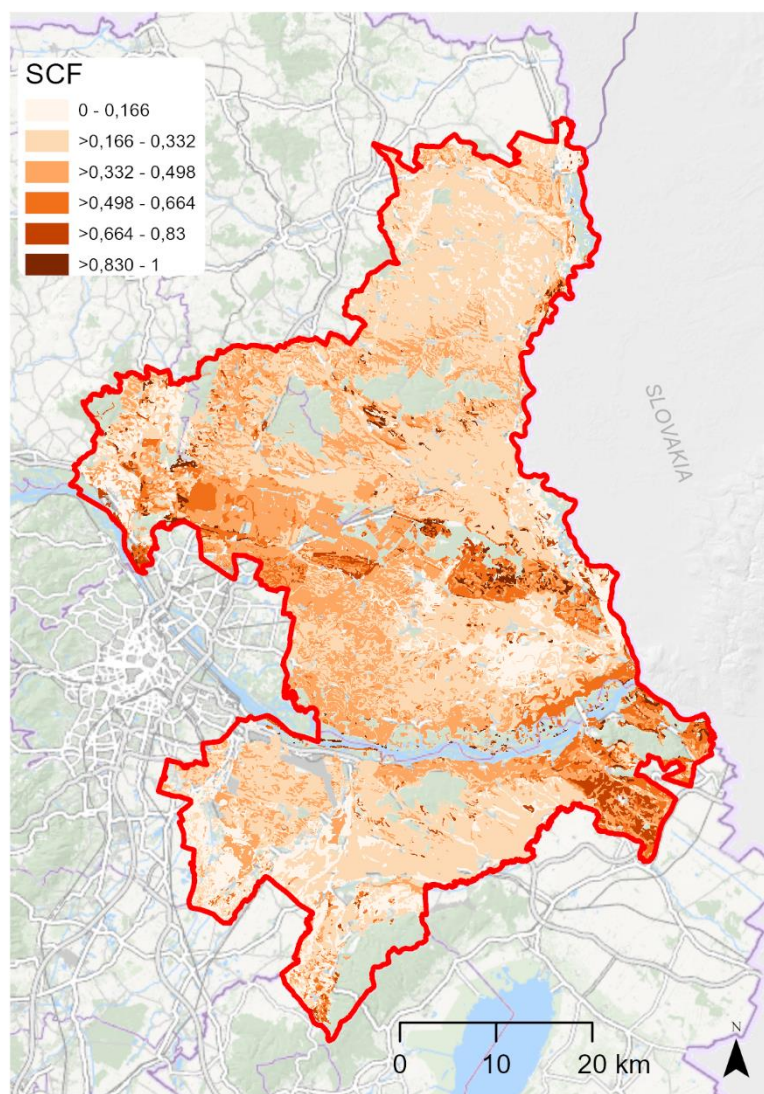

Figure S2: Soil crust factor (SCF) of the revised wind erosion equation for the study region in eastern Austria.

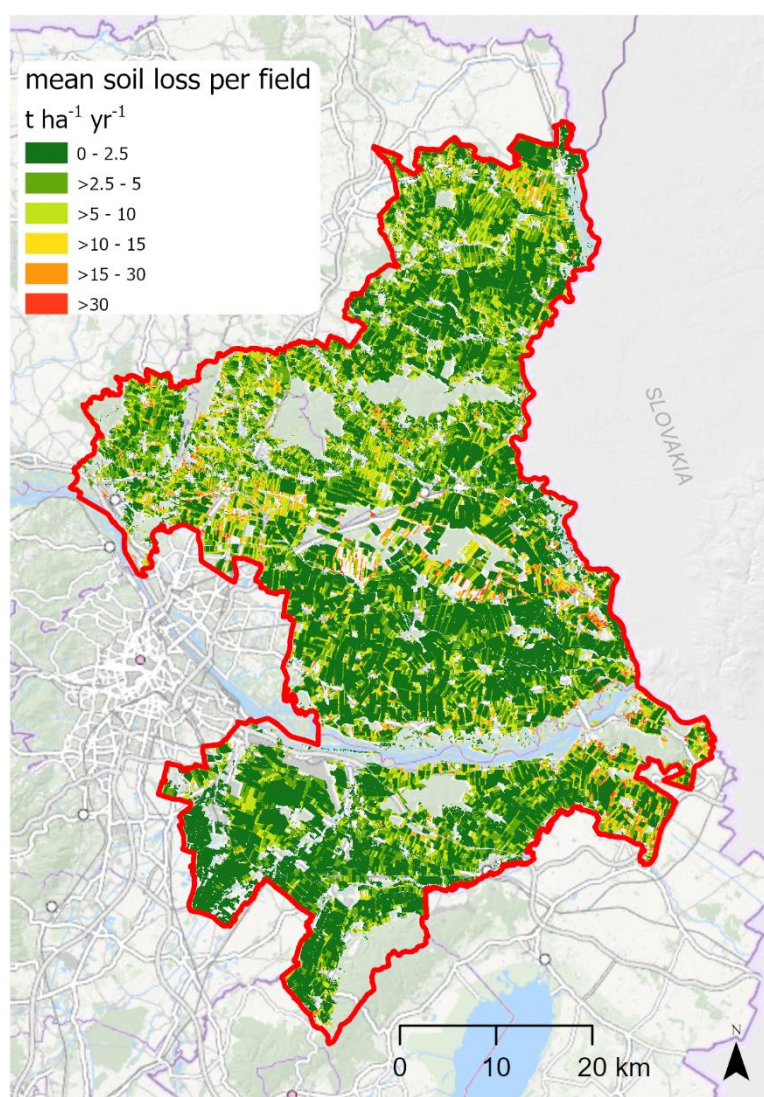

Figure S3: Mean soil loss per field in  $\text{t ha}^{-1} \text{ yr}^{-1}$  based on the revised wind erosion equation modeling.



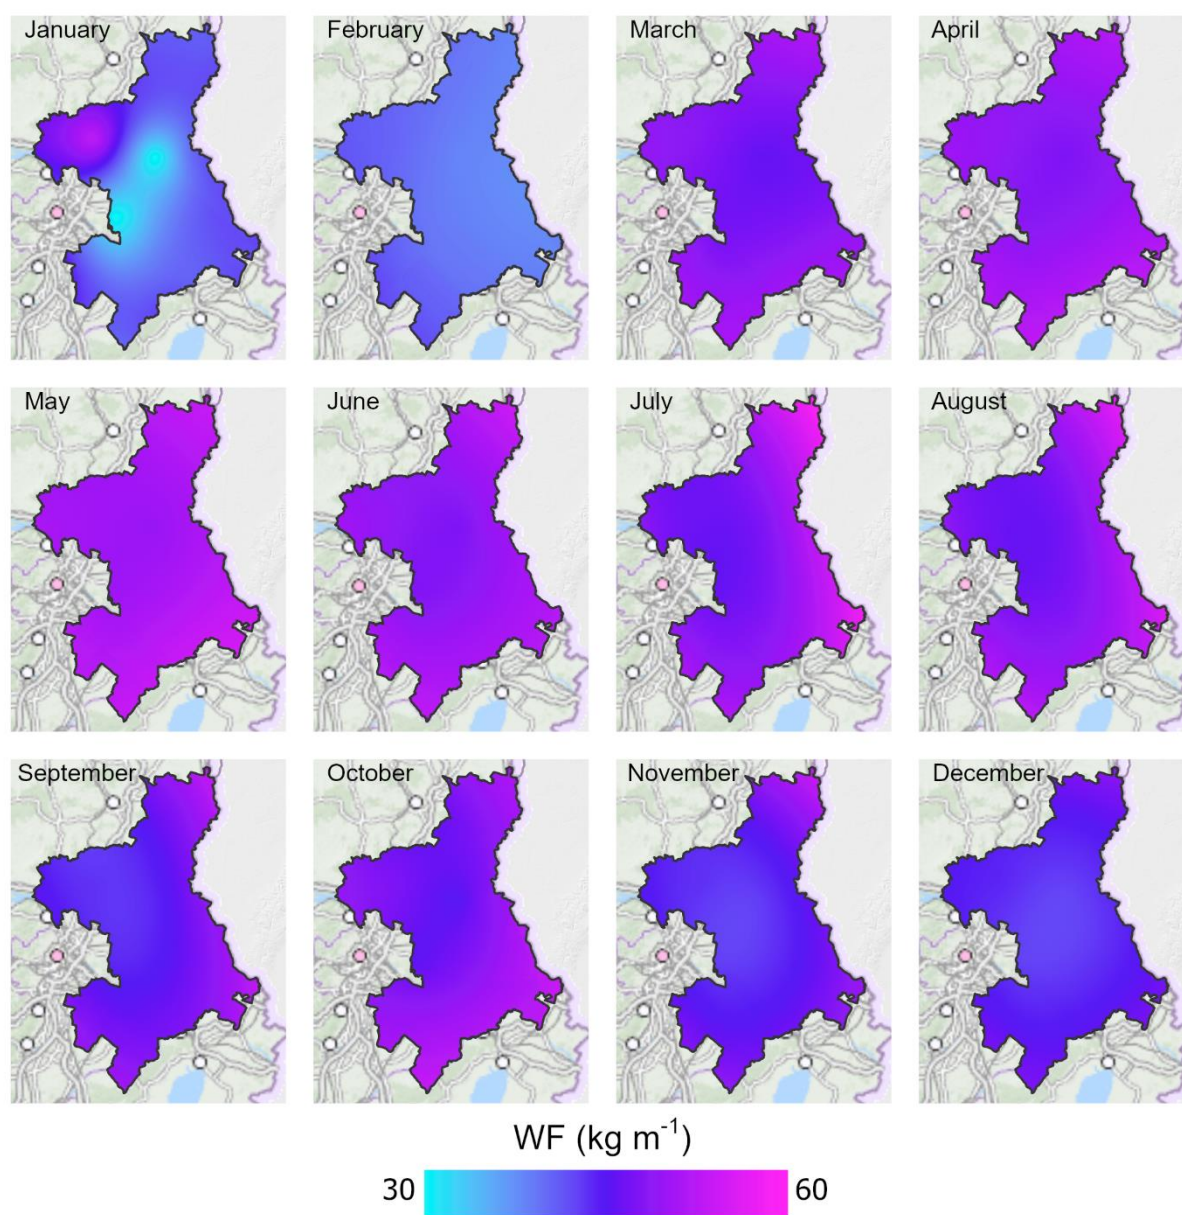

Figure S4: Interpolated weather factor (WF) of the revised wind erosion equation based on daily meteorological data of 22 stations (period 2010–2017).

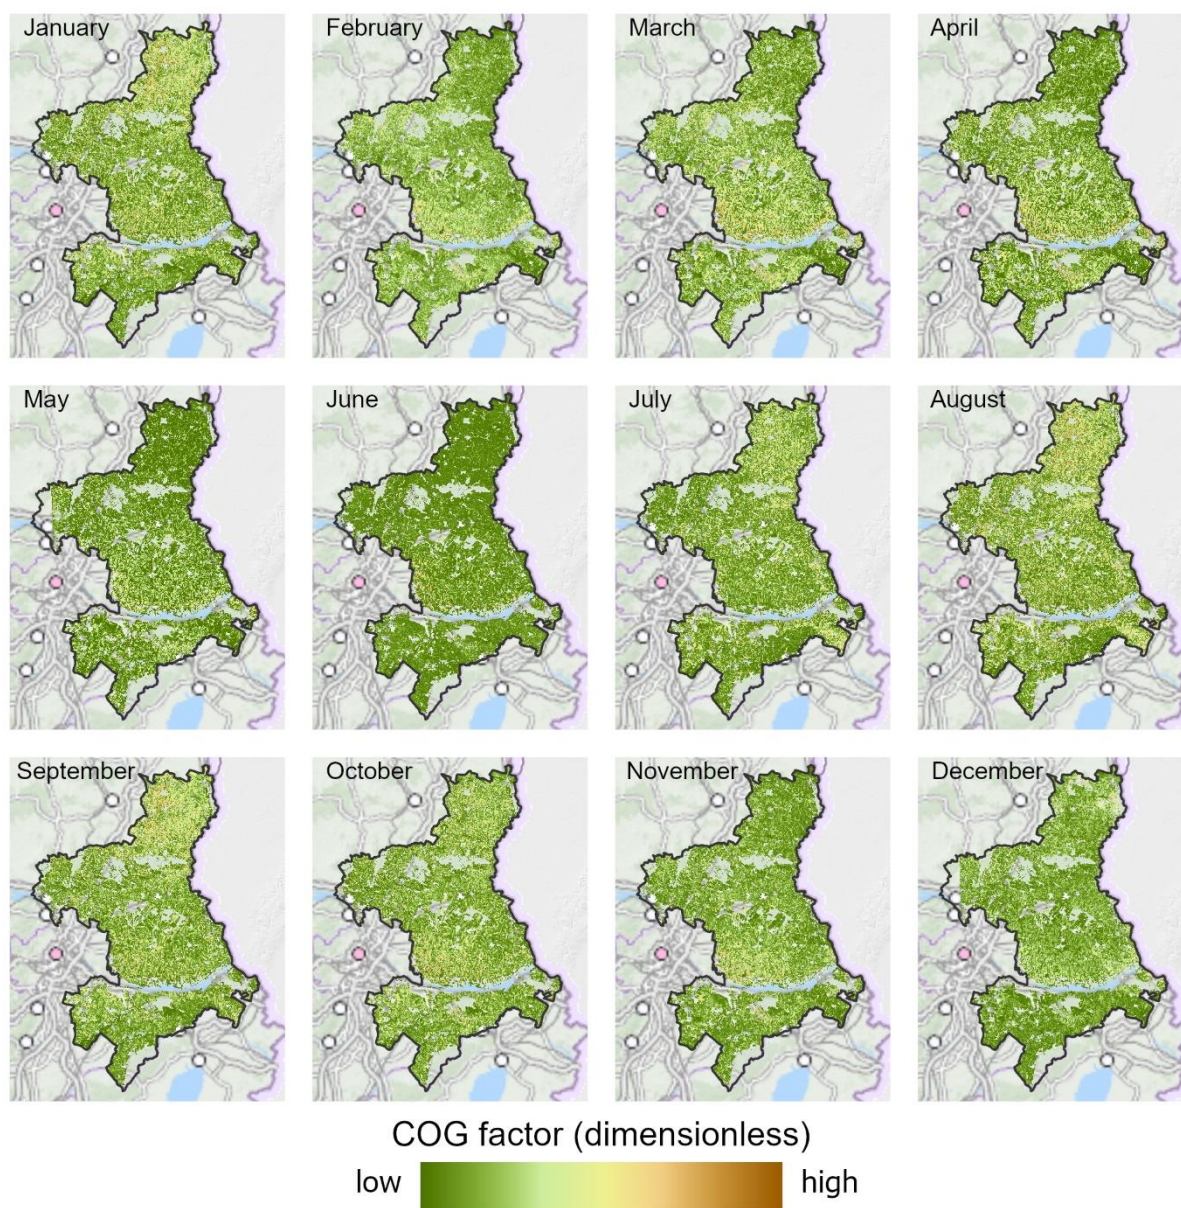

Figure S5: Monthly combined crop factor (COG) of the revised wind erosion equation (dimensionless) for the study region. The smaller the factor, the more soil erosion by wind is reduced. Please note data gaps in the western part of the study region in some months due to missing satellite imagery. Dots represent major cities.



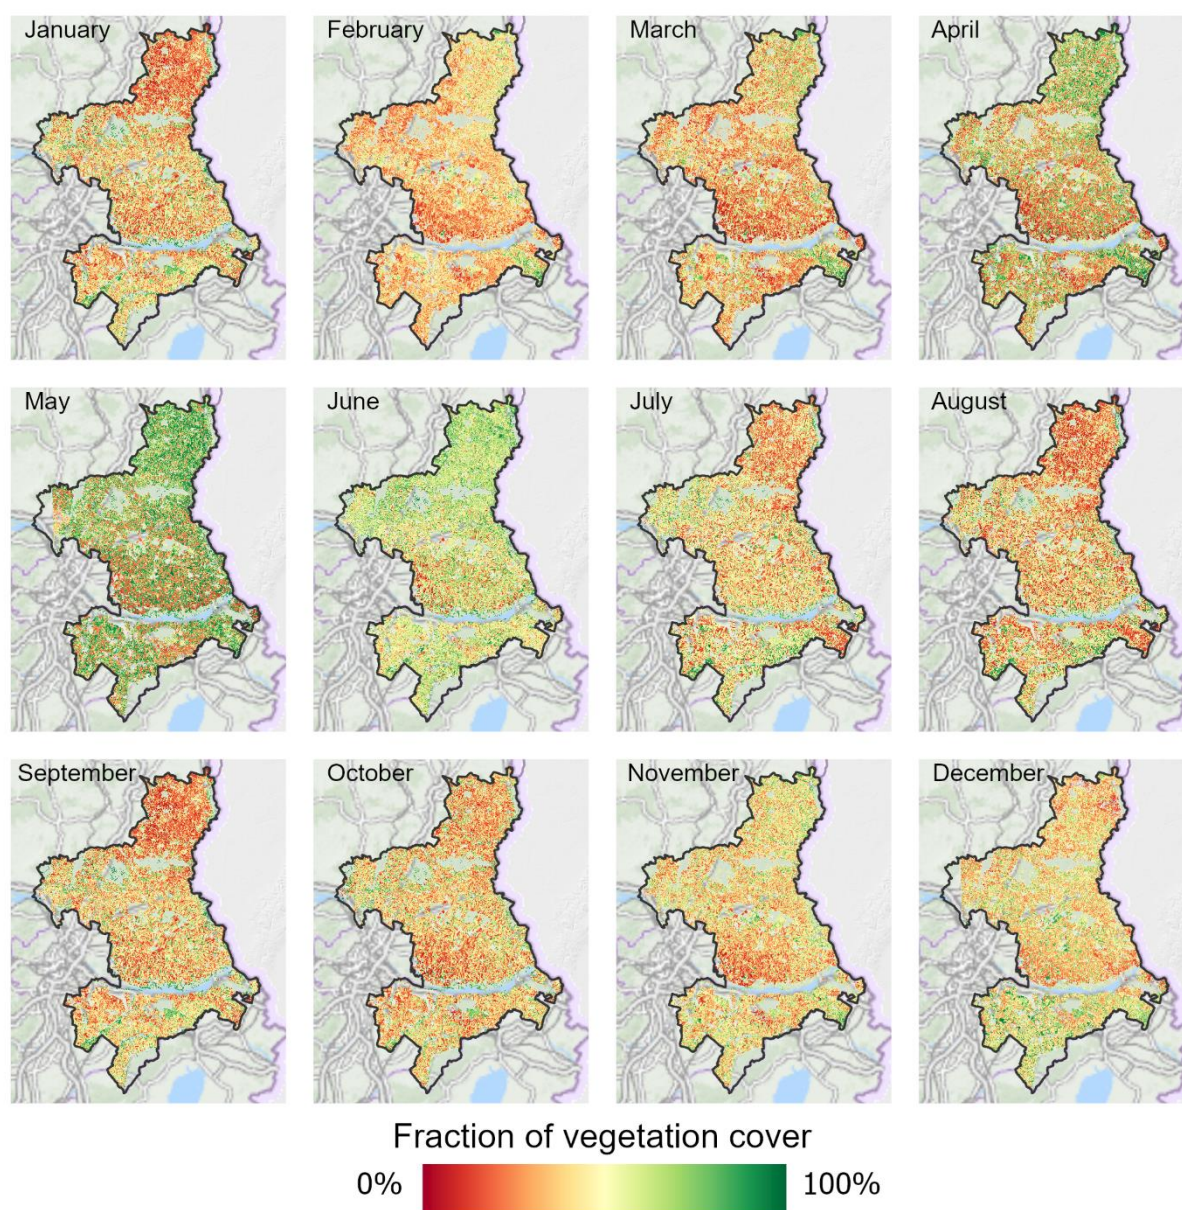

Figure S6: Monthly fraction of vegetation cover derived by Sentinel-2 data for each month (equation 18). Please note data gaps in the western part of the study region in some months (e.g., May, December) due to missing satellite imagery.

Table S4: Distribution of raster cells assigned to soil erosion severity classes according to different classification schemes based on the modeling of annual soil loss rates by revised wind erosion equation. The ranges in brackets below the verbal classification indicate the class borders in  $t\ ha^{-1}\ yr^{-1}$ .

| Classification after Zachar [68] | %    | Classification after Rezaei et al. [73] | %    | Classification after Sharma [74] | %    | Classification after Woldemariam et al. [75] | %    |
|----------------------------------|------|-----------------------------------------|------|----------------------------------|------|----------------------------------------------|------|
| weak<br>(0 - 0.5)                | 30.3 | very low<br>(0 - 2.5)                   | 59.6 | very low<br>(0 - 5)              | 77.1 | very low<br>(0 - 5)                          | 77.1 |
| slight<br>(>0.5 - 5)             | 46.8 | low<br>(>2.5 - 5)                       | 17.5 | low<br>(>5 - 10)                 | 14.3 | low<br>(>5 - 10)                             | 14.3 |
| moderate<br>(>5 - 15)            | 18.8 | medium<br>(>5 - 15)                     | 18.8 | medium<br>(>10 - 20)             | 6.3  | low medium<br>(>10 - 15)                     | 4.5  |
| severe<br>(>15 - 50)             | 3.8  | high<br>(>15 - 60)                      | 3.9  | high<br>(>20)                    | 2.3  | medium<br>(>15 - 20)                         | 1.8  |
| very severe<br>(>50 - 200)       | 0.3  | very high<br>(>60)                      | 0.2  |                                  |      | high medium<br>(>20 - 25)                    | 0.9  |
| catastrophic<br>(>200)           | 0.0  |                                         |      |                                  |      | high<br>(>25 - 35)                           | 0.8  |
|                                  |      |                                         |      |                                  |      | very high<br>(>35 - 50)                      | 0.6  |
|                                  |      |                                         |      |                                  |      | extremely high<br>(>50)                      | 0.0  |
